# Supplementary material
Source: PubMed Central journal article supplement (PMC3271864)
Supplement: 1110224109_pnas.1110224109_SI.pdf [file 1110224109_pnas.1110224109_SI.pdf]

# Supplementary Information

Sun et al. 10.1073/pnas.1110224109

## SI Materials and Methods.

**Cloning, Overexpression, and Purification of gp16 Domains.** The *g16* domain sequences of phages T4 and 44RR2 were amplified by PCR using specific primers and phage DNA as templates (the phage DNAs from T4-related phages were a kind gift from Dr. James D. Karam, Tulane University School of Medicine, New Orleans, LA). The N-C domain fusion was constructed using the PCR directed splicing by overlap extension strategy (1, 2). The amplified DNA fragments were concentrated by ammonium acetate/isopropyl alcohol precipitation, digested with appropriate restriction enzymes, purified by agarose gel electrophoresis, and ligated to the linearized pET-28b plasmid DNA. In-frame insertion of these fragments into the vector resulted in the fusion of a hexa-histidine tag to the N terminus of each construct. The ligated DNAs were transformed into *Escherichia coli* XL10 Gold-competent cells (Stratagene) and miniprep plasmid DNAs were prepared by the alkaline lysis procedure (Qiagen). The presence of DNA inserts and their orientation were tested using restriction digestion and/or amplification with insert-specific primers. The accuracy of the cloned DNA was confirmed by DNA sequencing (Davis Sequencing, Inc.). For overexpression of the gp16 domains, the plasmids were transformed into *E. coli* BL21 (DE3) pLysS-competent cells (Stratagene) and induced with IPTG at 30 °C for 2.5–3.5 h. The solubility of the overexpressed proteins was tested with bacterial protein extraction reagent (Pierce). For purification of gp16 domain proteins, cells following overexpression were harvested by centrifugation at  $8,200 \times g$  for 15 min at 4 °C and were lysed using an Aminco French press (Thermo Fisher Scientific Inc.). The cell lysate was centrifuged at  $34,000 \times g$  for 20 min at 4 °C and the supernatant containing soluble proteins was purified by successive chromatography on Histrap HP (affinity for the hexa-histidine tag) and Hiloal Superdex 200 prep grade (size exclusion) columns using AKTA-PRIME and AKTA-FPLC systems (GE Healthcare), respectively. For some purifications, the samples after Histrap chromatography were purified by Mono Q-5/50 GL ion exchange chromatography (GE Healthcare) followed by Superdex 200 gel filtration.

**Crystallization.** The full length and a 1–125 amino acid fragment of 44RR2 gp16 were concentrated to 10 mg/mL in 20 mM Tris-HCl (pH 8.0) and 100 mM NaCl. Crystals were grown by vapor diffusion in hanging drops at 20 °C. Two crystal forms were obtained, one from 25% PEG3350, 0.1 M Hepes (pH 7.5) with space group  $P2_12_12_1$  and the other from 12.5% PEG3350, 0.1 M NaCl, 0.1 M Hepes (pH 7.5) with space group  $R3$ .

**Structure Determination.** Crystals were flash-frozen and data were collected at 100 K at the Advanced Photon Source GM/CACAT 23IDB beamline. Data were processed with the HKL2000 program (3). For the  $P2_12_12_1$  space group crystals, Matthews coefficient calculations and self-rotation function calculations using program GLRF (4) indicated that there is an 11-fold symmetric ring in each asymmetric unit. An 11-mer model was generated from the 8-mer structure of SF6 G1P (5) and was used as a molecular replacement search model using the programs Beast (6) and Phaser (7). Top ten solutions were used in phase extension to 6-Å resolution coupled with 11-fold averaging using the program

DM (8). Sausage-like densities were observed in one of the resulting maps indicating the presence of helices in the structure. A more precise mask was generated on the basis of the preliminary electron density map. Phases were then further extended to 2.8-Å resolution. The structure was built manually using the program Coot (9) and refined with the program Refmac (10) to 2.8-Å resolution. The structure for the  $R3$  space group crystals was determined by molecular replacement using the  $P2_12_12_1$  monomer structure as a search model with the program Phaser (7) and refined using the program Refmac (10) to 2.8-Å resolution (Table S1).

The structure for the  $R3$  space group crystals was determined by molecular replacement using the  $P2_12_12_1$  monomer structure as a search model with the program Phaser (7) and refined using the program Refmac to 1.8-Å resolution (10) (Table S1).

**ATPase Assay.** A previously developed ATPase assay protocol was used in this study (11). In brief, purified gp17 (0.5  $\mu$ M), either alone or with 5  $\mu$ M various gp16 domains (approximately 1:1 ratio of gp16 oligomer to gp17 monomer), was incubated at 37 °C for 20 min in a 20- $\mu$ L reaction mixture containing 0.5 mM unlabeled (cold) ATP and 75 nM [ $\gamma$ - $^{32}$ P] ATP (specific activity, 3,000 Ci/mmol; GE Healthcare) in ATPase buffer (50 mM Tris-HCl, pH 7.5, 0.1 M NaCl, 5 mM MgCl<sub>2</sub>). EDTA was added to a final concentration of 50 mM to stop the reaction, and the ATP hydrolysis products were separated by thin layer chromatography on polyethyleneimine-cellulose plates (Sigma-Aldrich). The plates were air-dried for autoradiography and phosphorimaging (Storm 820 PhosphorImager; GE Healthcare). The radioactive spots were quantified using ImageQuant software (GE Healthcare). Data shown are averages of four independent experiments.

**Nuclease Assay.** gp17 was incubated either alone or in the presence of gp16 domains with 100 ng of 48.5-kb phage  $\lambda$  DNA (Fermentas) in a 20- $\mu$ L reaction mixture containing 10 mM Tris-HCl, pH 8, 15 mM NaCl, and 5 mM MgCl<sub>2</sub> for 15 min at 37 °C. The reactions were terminated by the addition of EDTA to a final concentration of 50 mM, and the samples were electrophoresed on a 0.8% (wt/vol) agarose gel followed by ethidium bromide staining (12).

**DNA Packaging Assay.** gp17 (2  $\mu$ M) were incubated with T4 partial heads purified according to the procedure described previously (13) ( $10^{10}$  particles), gp16 domains, and 600 ng of 48.5-kb phage  $\lambda$  DNA in a 20- $\mu$ L reaction mixture containing 25 mM Tris-HCl, pH 8, 3 mM MgCl<sub>2</sub>, 1 mM ATP, and 65 mM NaCl for 45 min at room temperature. Unpackaged DNA was degraded by adding DNase I (Sigma-Aldrich) to a final concentration of 0.5  $\mu$ g/ $\mu$ L and incubated for 30 min at 37 °C. Proteinase K (Fermentas) was added to a final concentration of 0.5  $\mu$ g/ $\mu$ L in 50 mM EDTA (pH 8) and 0.2% SDS, and the samples were incubated for 30 min at 65 °C to release the packaged (DNase-protected) DNA. The reaction mixtures were loaded on a 0.8% agarose gel for electrophoresis. The ethidium bromide-stained DNA was quantified by the Gel DOC XR imaging system (BioRad) (14).

1. Rao VB, Mitchell MS (2001) The N-terminal ATPase site in the large terminase protein gp17 is critically required for DNA packaging in bacteriophage T4. *J Mol Biol* 314:401–411.

2. Horton RM, Hunt HD, Ho SN, Pullen JK, Pease LR (1989) Engineering hybrid genes without the use of restriction enzymes: Gene splicing by overlap extension. *Gene* 77:61–68.

3. Otwinowski Z, Minor W (1997) Processing of X-ray diffraction data collected in oscillation mode. *Methods in Enzymology*, ed Charles W. Carter, Jr. (Academic, New York), Vol 276, pp 307–326.

4. Tong LA, Rossmann MG (1990) The locked rotation function. *Acta Crystallogr A* 46:783–792.



**Table S1. Data collection and refinement statistics**

|                                     | 11-mer                           | 12-mer                    |
|-------------------------------------|----------------------------------|---------------------------|
| Data collection                     |                                  |                           |
| X-ray source                        | 23-ID-B                          | 23-ID-B                   |
| Wavelength, Å                       | 1.0332                           | 1.0332                    |
| Resolution, Å                       | 2.8                              | 1.8                       |
| Space group                         | $P2_12_12_1$                     | $R3$                      |
| Unit cell, Å                        | $a = 83.0, b = 106.3, c = 136.7$ | $a = b = 140.6, c = 53.6$ |
| Unique reflections                  | 30,487                           | 35,876                    |
| Average redundancy                  | 5.5                              | 5.8                       |
| $I/\sigma^*$                        | 19.9 (4.8)                       | 25.0 (5.0)                |
| Completeness, %                     | 99.9 (100)                       | 99.6 (99.9)               |
| $R_{\text{merge}}, \%^{\dagger}$    | 7.8 (38.9)                       | 5.5 (39.2)                |
| Refinement                          |                                  |                           |
| Resolution, Å                       | 2.8                              | 1.8                       |
| $R_{\text{working}}, \%^{\ddagger}$ | 23.9 (31.0)                      | 18.7 (23.3)               |
| $R_{\text{free}}, \%^{\S}$          | 29.9 (34.0)                      | 22.0 (27.7)               |
| Average $B$ factor, Å <sup>2</sup>  | 58.4                             | 32.4                      |
| rmsd bonds, Å                       | 0.005                            | 0.008                     |
| rmsd angles, °                      | 0.812                            | 1.022                     |
| Ramachandran disallowed             | 0                                | 1                         |

\*Values in parentheses throughout the table correspond to the last shell.

<sup>†</sup> $R_{\text{merge}} = \sum |I - \langle I \rangle| / \sum I$ , where  $I$  is measured intensity for reflections with indices  $hkl$ .

<sup>‡</sup> $R_{\text{working}} = \sum ||F_{\text{obs}}| - |F_{\text{calc}}|| / \sum |F_{\text{obs}}|$ .

<sup>§</sup> $R_{\text{free}}$  has the same formula as  $R_{\text{working}}$  except that calculation was made with the structure factors from the test set.

**Table S2. Interactions among subunits in the structure of 44RR gp16 ( $\alpha$ :  $\alpha$ -helix,  $t$ : turn,  $s$ : strand)**

| Interaction partner I |                                     |            | Interaction partner II |                                                     |            | Type of interaction      |     |                   |
|-----------------------|-------------------------------------|------------|------------------------|-----------------------------------------------------|------------|--------------------------|-----|-------------------|
| Monomer               | Atom                                | Position   | Monomer                | Atom                                                | Position   |                          |     |                   |
| $n$                   | LYS 43 NZ                           | $\alpha 1$ | $n + 1$                | ASN 40 OD1                                          | $s$        | H-bond side chain        |     |                   |
|                       | TYR 50 OH                           | $\alpha 1$ |                        | ASP 45 OD2                                          | $\alpha 1$ | H-bond side chain        |     |                   |
|                       | ARG 54 NH1                          | $\alpha 1$ |                        | VAL 36 O                                            | $s$        | H-bond main chain        |     |                   |
|                       | ARG 54 NH1                          | $\alpha 1$ |                        | SER 37 OG                                           | $s$        | H-bond side chain        |     |                   |
|                       | ARG 54 NE                           | $\alpha 1$ |                        | ASP 49 OD2                                          | $\alpha 1$ | salt bridge              |     |                   |
|                       | HIS 58 NE2                          | $\alpha 1$ |                        | ASP 49 OD1                                          | $\alpha 1$ | pH-dependent salt bridge |     |                   |
|                       | SER 61 OG                           | $\alpha 1$ |                        | ASN 56 ND2                                          | $\alpha 1$ | H-bond side chain        |     |                   |
|                       | GLN 62 OE1                          | $\alpha 1$ |                        | ARG 33 N                                            | $s$        | H-bond main chain        |     |                   |
|                       | LYS 76 NZ                           | $\alpha 1$ |                        | ASP 66 OD2                                          | $\alpha 1$ | salt bridge              |     |                   |
|                       | ASP 79 OD1                          | $t$        |                        | HIS 83 NE2                                          | $\alpha 2$ | pH-dependent salt bridge |     |                   |
|                       | MET 91 O                            | $\alpha 2$ |                        | GLN 60 NE2                                          | $\alpha 1$ | H-bond main chain        |     |                   |
|                       | THR 95 OG1                          | $\alpha 2$ |                        | GLN 60 NE2                                          | $\alpha 1$ | H-bond side chain        |     |                   |
|                       | THR 95 OG1                          | $\alpha 2$ |                        | THR 97 OG1                                          | $\alpha 2$ | H-bond side chain        |     |                   |
|                       | HIS 105 ND1                         | $\alpha 2$ |                        | ARG 42 NH1                                          | $\alpha 1$ | H-bond side chain        |     |                   |
|                       | HIS 105 NE2                         | $\alpha 2$ |                        | ASP 49 OD2                                          | $\alpha 1$ | pH-dependent salt bridge |     |                   |
|                       | LYS 106 NZ                          | $\alpha 2$ |                        | GLU 107 OE1                                         | $\alpha 2$ | salt bridge              |     |                   |
|                       | LYS 106 NZ                          | $\alpha 2$ |                        | ASP 110 OD2                                         | $\alpha 2$ | salt bridge              |     |                   |
|                       | LYS 109 NZ                          | $\alpha 2$ |                        | ASP 110 O                                           | $\alpha 2$ | H-bond main chain        |     |                   |
|                       | $n$                                 | GLU 73 OE2 |                        | $\alpha 1$                                          | $n + 2$    | LEU 30 N                 | $s$ | H-bond main chain |
|                       |                                     | LYS 76 NZ  |                        | $\alpha 1$                                          |            | ALA 28 O                 | $s$ | H-bond main chain |
| ASN 77 OD1            |                                     | $\alpha 1$ | TYR 27 N               | $s$                                                 |            | H-bond main chain        |     |                   |
| $n$                   | V53, M63, M67, V86, L90, M108, L111 |            | $n + 1$                | A66, L72, A75, V84, F87, A88, M91, M94, M101, L102, |            | hydrophobic interaction  |     |                   |
